# Supplementary material for: Genetic dissection of the developmental behaviours of plant height in wheat under diverse water regimes
Source: PubMed Central journal article supplement — J Exp Bot. 2010 May 24;61(11):2923–37. doi: 10.1093/jxb/erq117 (PMC3298886; doi:10.1093/jxb/erq117), 2010-05-24
Supplement: erq117_1.pdf [file erq117_1.pdf]

## Genetic Dissection of the Developmental Behaviors of Plant Height in Wheat under Diverse Water Regimes

**Xianshan Wu, Zhenghang Wang, Xiaoping Chang, and Ruilian Jing**

**Table S1. Correlation coefficients between stages for plant height of wheat grown in ten environments**

| Environment | Stage | S1                  | S2                  | S3                  | S4                  | S5                  |
|-------------|-------|---------------------|---------------------|---------------------|---------------------|---------------------|
| E1\E6       | S1    |                     | 0.84 <sup>***</sup> | 0.77 <sup>***</sup> | 0.71 <sup>***</sup> | 0.63 <sup>***</sup> |
|             | S2    | 0.93 <sup>***</sup> |                     | 0.86 <sup>***</sup> | 0.80 <sup>***</sup> | 0.67 <sup>***</sup> |
|             | S3    | 0.91 <sup>***</sup> | 0.95 <sup>***</sup> |                     | 0.87 <sup>***</sup> | 0.73 <sup>***</sup> |
|             | S4    | 0.87 <sup>***</sup> | 0.90 <sup>***</sup> | 0.92 <sup>***</sup> |                     | 0.76 <sup>***</sup> |
|             | S5    | 0.80 <sup>***</sup> | 0.82 <sup>***</sup> | 0.85 <sup>***</sup> | 0.94 <sup>***</sup> |                     |
| E2\E7       | S1    |                     | 0.83 <sup>***</sup> | 0.82 <sup>***</sup> | 0.79 <sup>***</sup> | 0.73 <sup>***</sup> |
|             | S2    | 0.88 <sup>***</sup> |                     | 0.88 <sup>***</sup> | 0.90 <sup>***</sup> | 0.84 <sup>***</sup> |
|             | S3    | 0.84 <sup>***</sup> | 0.94 <sup>***</sup> |                     | 0.93 <sup>***</sup> | 0.87 <sup>***</sup> |
|             | S4    | 0.83 <sup>***</sup> | 0.92 <sup>***</sup> | 0.97 <sup>***</sup> |                     | 0.92 <sup>***</sup> |
|             | S5    | 0.77 <sup>***</sup> | 0.88 <sup>***</sup> | 0.94 <sup>***</sup> | 0.96 <sup>***</sup> |                     |
| E3\E8       | S1    |                     | 0.89 <sup>***</sup> | 0.85 <sup>***</sup> | 0.84 <sup>***</sup> | 0.84 <sup>***</sup> |
|             | S2    | 0.94 <sup>***</sup> |                     | 0.94 <sup>***</sup> | 0.93 <sup>***</sup> | 0.93 <sup>***</sup> |
|             | S3    | 0.91 <sup>***</sup> | 0.98 <sup>***</sup> |                     | 0.98 <sup>***</sup> | 0.95 <sup>***</sup> |
|             | S4    | 0.91 <sup>***</sup> | 0.97 <sup>***</sup> | 0.98 <sup>***</sup> |                     | 0.97 <sup>***</sup> |
|             | S5    | 0.87 <sup>***</sup> | 0.93 <sup>***</sup> | 0.95 <sup>***</sup> | 0.96 <sup>***</sup> |                     |
| E4\E9       | S1    |                     | 0.85 <sup>***</sup> | 0.78 <sup>***</sup> | 0.74 <sup>***</sup> | 0.71 <sup>***</sup> |
|             | S2    | 0.93 <sup>***</sup> |                     | 0.95 <sup>***</sup> | 0.93 <sup>***</sup> | 0.91 <sup>***</sup> |
|             | S3    | 0.90 <sup>***</sup> | 0.96 <sup>***</sup> |                     | 0.98 <sup>***</sup> | 0.97 <sup>***</sup> |
|             | S4    | 0.87 <sup>***</sup> | 0.93 <sup>***</sup> | 0.99 <sup>***</sup> |                     | 0.97 <sup>***</sup> |
|             | S5    | 0.83 <sup>***</sup> | 0.88 <sup>***</sup> | 0.95 <sup>***</sup> | 0.97 <sup>***</sup> |                     |
| E5\E10      | S1    |                     | 0.94 <sup>***</sup> | 0.88 <sup>***</sup> | 0.87 <sup>***</sup> | 0.84 <sup>***</sup> |
|             | S2    | 0.97 <sup>***</sup> |                     | 0.98 <sup>***</sup> | 0.96 <sup>***</sup> | 0.93 <sup>***</sup> |
|             | S3    | 0.93 <sup>***</sup> | 0.96 <sup>***</sup> |                     | 0.97 <sup>***</sup> | 0.96 <sup>***</sup> |
|             | S4    | 0.92 <sup>***</sup> | 0.95 <sup>***</sup> | 0.97 <sup>***</sup> |                     | 0.97 <sup>***</sup> |
|             | S5    | 0.88 <sup>***</sup> | 0.92 <sup>***</sup> | 0.95 <sup>***</sup> | 0.98 <sup>***</sup> |                     |

E1, Fenyang, Shanxi province in 2001 (F01) under drought-stressed conditions (DS); E2 and E4, Haidian, Beijing, 2005 (H05) and 2006 (H06) under DS; E3 and E5, Changping, Beijing, 2005 (Ch05) and 2006 (Ch06) under DS; E6, Fenyang, Shanxi, 2001 (F01) under well-watered conditions (WW); E7 and E9, Haidian, Beijing, 2005 (H05) and 2006 (H06), WW; E8 and E10, Changping, Beijing, 2005 (Ch05) and 2006 (Ch06), WW; S1, S2, S3, S4 and S5 indicate the first, second, third, fourth and fifth measuring stages; \*, \*\*, \*\*\*, \*\*\*\* indicate significance at P=0.05, 0.01, 0.005 and 0.0001, respectively.

Values in the upper right and lower left segments are the correlation coefficients of stages for unconditional plant height in E1 and in E6, respectively, and so on.

**Table S2. ANOVA for developmental behavior of plant height among different environmental components in wheat DHLs**

| Stage    | Source     | DF        | SS                | Mean Square       | F Value                |
|----------|------------|-----------|-------------------|-------------------|------------------------|
| S1/S1 S0 | Geno       | 149/149   | 39991.6/39991.6   | 268.4/268.4       | 32.2****/32.2****      |
|          | Water      | 1/1       | 39270.4/39270.4   | 39270.4/39270.4   | 4708.5****/4708.5****  |
|          | YS         | 4/4       | 40420.4/40420.4   | 10105.1/10105.1   | 1211.6****/1211.6****  |
|          | Water×Geno | 149/149   | 4275.5/4275.5     | 28.7/28.7         | 3.4****/3.4****        |
|          | YS×Geno    | 596/596   | 8153.8/8153.8     | 13.7/13.7         | 1.6****/1.6****        |
|          | YS×Water   | 4/4       | 5020.2/5020.2     | 1255.0/1255.0     | 150.5****/150.5****    |
|          | Error      | 596/596   | 4970.9/4970.9     | 8.3/8.3           |                        |
|          | Total      | 1499/1499 | 142102.8/142102.8 |                   |                        |
| S2/S2 S1 | Geno       | 149/149   | 124172.4/5760.1   | 833.4/38.7        | 67.8****/4.4****       |
|          | Water      | 1/1       | 82085.2/81758.6   | 82085.2/81758.6   | 6678.7****/9348.0****  |
|          | YS         | 4/4       | 105415.3/464.0    | 26353.8/116.0     | 2144.2****/13.3****    |
|          | Water×Geno | 149/149   | 9146.1/2383.0     | 61.4/16.0         | 5.0****/1.8****        |
|          | YS×Geno    | 596/596   | 22114.0/9635.2    | 37.1/16.2         | 3.0****/1.9****        |
|          | YS×Water   | 4/4       | 11167.2/7769.8    | 2791.8/1942.5     | 227.2****/222.1****    |
|          | Error      | 596/596   | 7325.2/5212.7     | 12.3/8.7          |                        |
|          | Total      | 1499/1499 | 361425.5/112983.4 |                   |                        |
| S3/S3 S2 | Geno       | 149/149   | 238035.4/5813.5   | 1597.6/39.0       | 103.1****/3.2****      |
|          | Water      | 1/1       | 137974.2/135095.8 | 137974.2/135095.8 | 8903.5****/11097.8**** |
|          | YS         | 4/4       | 140014.4/5429.5   | 35003.6/1357.4    | 2258.8****/111.5****   |
|          | Water×Geno | 149/149   | 8130.5/2389.6     | 54.6/16.0         | 3.5****/1.3****        |
|          | YS×Geno    | 596/596   | 40211.0/10976.9   | 67.5/18.4         | 4.4****/1.5****        |
|          | YS×Water   | 4/4       | 11395.8/4991.9    | 2849.0/1248.0     | 183.8****/102.5****    |
|          | Error      | 596/596   | 9236.0/7255.3     | 15.5/12.2         |                        |
|          | Total      | 1499/1499 | 584997.3/171952.6 |                   |                        |
| S4/S4 S3 | Geno       | 149/149   | 318903.6/2771.6   | 2140.3/18.6       | 109.0****/1.4****      |
|          | Water      | 1/1       | 155493.4/148758.6 | 155493.4/148758.6 | 7917.5****/11319.9**** |
|          | YS         | 4/4       | 98080.6/6148.4    | 24520.2/1537.1    | 1248.5****/117.0****   |
|          | Water×Geno | 149/149   | 5179.5/2031.0     | 34.8/13.6         | 1.8****/1****          |
|          | YS×Geno    | 596/596   | 41716.3/10107.0   | 70.0/17.0         | 3.6****/1.3****        |
|          | YS×Water   | 4/4       | 18048.2/1909.4    | 4512.0/477.4      | 229.8****/36.3****     |
|          | Error      | 596/596   | 11705.0/7832.2    | 19.6/13.1         |                        |
|          | Total      | 1499/1499 | 649126.5/179558.3 |                   |                        |
| S5/S5 S4 | Geno       | 149/149   | 313699.9/8614.5   | 2105.4/57.8       | 84.8****/4.9****       |
|          | Water      | 1/1       | 85733.4/85456.9   | 85733.4/85456.9   | 3452.0****/7217.9****  |
|          | YS         | 4/4       | 113188.0/15749.4  | 28297.0/3937.4    | 1139.4****/332.6****   |
|          | Water×Geno | 149/149   | 3699.5/1965.6     | 24.8/13.2         | 1/1.1                  |
|          | YS×Geno    | 596/596   | 40491.1/15371.4   | 67.9/25.8         | 2.7****/2.2****        |
|          | YS×Water   | 4/4       | 11972.7/2801.5    | 2993.2/700.4      | 120.5****/59.2****     |
|          | Error      | 596/596   | 14802.3/7056.4    | 24.8/11.8         |                        |
|          | Total      | 1499/1499 | 583586.8/137015.6 |                   |                        |

Geno: Genotype; Water: Water regimes; YS: Year by site combination.

S1, S2, S3, S4 and S5 are as shown in Table S1; S1|S0, S2|S1, S3|S2, S4|S3, S5|S4 indicate the first, second, third, fourth and fifth measuring periods.

\*, \*\*, \*\*\*, \*\*\*\* are as shown in Table S1.

**Table S3. ANOVA for developmental behavior of plant height among different environmental combinations (year × site × water regime combination) in wheat DHLs**

| Stage | Source | DF   | SS       | MS      | F Value    |
|-------|--------|------|----------|---------|------------|
| S1    | Env    | 9    | 84711.0  | 9412.3  | 244.4****  |
|       | Error  | 1490 | 57391.8  | 38.5    |            |
|       | Total  | 1499 | 142102.8 |         |            |
| S2    | Env    | 9    | 198667.8 | 22074.2 | 202.1****  |
|       | Error  | 1490 | 162757.8 | 109.2   |            |
|       | Total  | 1499 | 361425.5 |         |            |
| S3    | Env    | 9    | 289384.5 | 32153.8 | 162.1****  |
|       | Error  | 1490 | 295612.8 | 198.4   |            |
|       | Total  | 1499 | 584997.3 |         |            |
| S4    | Env    | 9    | 271622.2 | 30180.2 | 119.1****  |
|       | Error  | 1490 | 377504.4 | 253.4   |            |
|       | Total  | 1499 | 649126.5 |         |            |
| S5    | Env    | 9    | 210894.1 | 23432.7 | 93.7****   |
|       | Error  | 1490 | 372692.7 | 250.1   |            |
|       | Total  | 1499 | 583586.8 |         |            |
| S1 S0 | Env    | 9    | 84711.0  | 9412.3  | 244.4****  |
|       | Error  | 1490 | 57391.8  | 38.5    |            |
|       | Total  | 1499 | 142102.8 |         |            |
| S2 S1 | Env    | 9    | 89992.4  | 9999.2  | 648.0****  |
|       | Error  | 1490 | 22991.0  | 15.4    |            |
|       | Total  | 1499 | 112983.4 |         |            |
| S3 S2 | Env    | 9    | 145517.3 | 16168.6 | 911.3****  |
|       | Error  | 1490 | 26435.3  | 17.7    |            |
|       | Total  | 1499 | 171952.6 |         |            |
| S4 S3 | Env    | 9    | 156816.4 | 17424.0 | 1141.6**** |
|       | Error  | 1490 | 22741.8  | 15.3    |            |
|       | Total  | 1499 | 179558.3 |         |            |
| S5 S4 | Env    | 9    | 104007.8 | 11556.4 | 521.7****  |
|       | Error  | 1490 | 33007.8  | 22.2    |            |
|       | Total  | 1499 | 137015.6 |         |            |

Notes as shown in Table S2.

**Table S4. Correlation coefficients between periods for plant height of wheat grown in ten environments**

| Environment | Period | S1 S0                | S2 S1                | S3 S2                | S4 S3                | S5 S4                |
|-------------|--------|----------------------|----------------------|----------------------|----------------------|----------------------|
| E6\E1       | S1 S0  |                      | -0.61 <sup>***</sup> | -0.51 <sup>***</sup> | -0.12                | -0.15                |
|             | S2 S1  | -0.72 <sup>***</sup> |                      | 0.29 <sup>***</sup>  | 0.26 <sup>***</sup>  | 0.15                 |
|             | S3 S2  | -0.35 <sup>***</sup> | 0.17 <sup>*</sup>    |                      | -0.01                | 0.15                 |
|             | S4 S3  | -0.12                | 0.09                 | -0.02                |                      | -0.14                |
|             | S5 S4  | -0.08                | 0.01                 | 0.08                 | 0.17 <sup>*</sup>    |                      |
| E7\E2       | S1 S0  |                      | -0.21 <sup>**</sup>  | -0.36 <sup>***</sup> | -0.26 <sup>***</sup> | 0.19 <sup>*</sup>    |
|             | S2 S1  | -0.50 <sup>***</sup> |                      | -0.48 <sup>***</sup> | 0.12                 | 0.12                 |
|             | S3 S2  | -0.09                | -0.11                |                      | -0.28 <sup>***</sup> | -0.09                |
|             | S4 S3  | 0.45 <sup>***</sup>  | -0.05                | 0.05                 |                      | -0.07                |
|             | S5 S4  | 0.41 <sup>***</sup>  | -0.08                | 0.18 <sup>*</sup>    | 0.23 <sup>***</sup>  |                      |
| E8\E3       | S1 S0  |                      | -0.17 <sup>*</sup>   | 0.29 <sup>***</sup>  | 0.18 <sup>*</sup>    | -0.22 <sup>**</sup>  |
|             | S2 S1  | 0.44 <sup>***</sup>  |                      | -0.04                | 0.13                 | -0.13                |
|             | S3 S2  | 0.46 <sup>***</sup>  | 0.59 <sup>***</sup>  |                      | -0.08                | -0.33 <sup>***</sup> |
|             | S4 S3  | -0.45 <sup>***</sup> | -0.53 <sup>***</sup> | -0.44 <sup>***</sup> |                      | -0.18 <sup>*</sup>   |
|             | S5 S4  | -0.59 <sup>***</sup> | -0.32 <sup>***</sup> | -0.34 <sup>***</sup> | 0.27 <sup>***</sup>  |                      |
| E9\E4       | S1 S0  |                      | 0.13                 | 0.07                 | 0.22 <sup>**</sup>   | 0.41 <sup>***</sup>  |
|             | S2 S1  | 0.02                 |                      | 0.21 <sup>**</sup>   | 0.50 <sup>***</sup>  | 0.33 <sup>***</sup>  |
|             | S3 S2  | 0.31 <sup>***</sup>  | -0.01                |                      | 0.26 <sup>***</sup>  | 0.42 <sup>***</sup>  |
|             | S4 S3  | 0.54 <sup>***</sup>  | 0.24 <sup>***</sup>  | 0.53 <sup>***</sup>  |                      | 0.23 <sup>**</sup>   |
|             | S5 S4  | 0.12                 | -0.13                | 0.40 <sup>***</sup>  | 0.17 <sup>*</sup>    |                      |
| E10\E5      | S1 S0  |                      | 0.51 <sup>***</sup>  | 0.24 <sup>***</sup>  | -0.15                | -0.45 <sup>***</sup> |
|             | S2 S1  | 0.40 <sup>***</sup>  |                      | 0.58 <sup>***</sup>  | -0.12                | -0.37 <sup>***</sup> |
|             | S3 S2  | -0.35 <sup>***</sup> | -0.12                |                      | -0.21 <sup>**</sup>  | -0.11                |
|             | S4 S3  | -0.06                | 0.1                  | 0.03                 |                      | -0.17 <sup>*</sup>   |
|             | S5 S4  | -0.41 <sup>***</sup> | -0.13                | 0.33 <sup>***</sup>  | 0.34 <sup>***</sup>  |                      |

E1 to E10 are as shown in Table S1; S1|S0 to S5|S4, \*, \*\* and \*\*\* are as shown in Table S2.

Values in the upper right and lower left segments are the correlation coefficients of periods for conditional plant height in E1 and in E6, respectively, and so on.

Table S5. Unconditional epistatic QTLs affecting plant height of wheat at five growth stages in ten environments

| QTL <sub>i</sub>     | Flanking marker <sub>i</sub> | QTL <sub>j</sub>     | Flanking marker <sub>j</sub> | Stage | <i>aa</i>            | <i>aae</i>                                                                                                 | <i>h</i> <sup>2</sup> ( <i>aa</i> )% | <i>h</i> <sup>2</sup> ( <i>aae</i> )% |
|----------------------|------------------------------|----------------------|------------------------------|-------|----------------------|------------------------------------------------------------------------------------------------------------|--------------------------------------|---------------------------------------|
| <i>QPh.cgb-1A.1</i>  | <i>Xcwm517-Xwmc20</i>        | <i>QPh.cgb-6B.2</i>  | <i>P8444.1-P3454.2</i>       | S2    | 1.74 <sup>***</sup>  |                                                                                                            | 0.11                                 |                                       |
| <i>QPh.cgb-1A.3</i>  | <i>Xwmc59-Xwmc254</i>        | <i>QPh.cgb-2A.1</i>  | <i>P3715.2-P1138.2</i>       | S3    | 1.30 <sup>***</sup>  |                                                                                                            | 0.24                                 |                                       |
| <i>QPh.cgb-1B.2</i>  | <i>Xgwm273-Xgwm131</i>       | <i>QPh.cgb-7D.3</i>  | <i>Xwmc463-Xgwm295</i>       | S4    | 1.29 <sup>***</sup>  |                                                                                                            | 0.01                                 |                                       |
| <i>QPh.cgb-1B.3</i>  | <i>Xgwm131-Xwmc156</i>       | <i>QPh.cgb-3B.7</i>  | <i>Xgwm644.2-Xwmc3</i>       | S3    | -0.98 <sup>***</sup> |                                                                                                            | 0.00                                 |                                       |
| <i>QPh.cgb-1B.4</i>  | <i>Xwmc156-P3446.1</i>       | <i>QPh.cgb-2D.6</i>  | <i>P4233.2-P6411.4</i>       | S4    | -2.10 <sup>***</sup> |                                                                                                            | 1.60                                 |                                       |
|                      |                              |                      |                              | S5    | -4.59 <sup>***</sup> |                                                                                                            | 1.50                                 |                                       |
| <i>QPh.cgb-1B.4</i>  | <i>Xwmc156-P3446.1</i>       | <i>QPh.cgb-2D.4</i>  | <i>Xgwm157-Xgwm539</i>       | S5    | 2.58 <sup>***</sup>  |                                                                                                            | 1.57                                 |                                       |
| <i>QPh.cgb-1B.6</i>  | <i>P8222.3-Xcwm70</i>        | <i>QPh.cgb-6B.3</i>  | <i>P3454.2-P8466.1</i>       | S4    | -1.25 <sup>***</sup> |                                                                                                            | 0.02                                 |                                       |
| <i>QPh.cgb-1B.7</i>  | <i>P3474.4-Xcwm548</i>       | <i>QPh.cgb-3B.5</i>  | <i>Xgwm72-Xgwm274</i>        | S3    | 0.99 <sup>***</sup>  |                                                                                                            | 0.05                                 |                                       |
| <i>QPh.cgb-1B.7</i>  | <i>P3474.4-Xcwm548</i>       | <i>QPh.cgb-3B.7</i>  | <i>Xgwm644.2-Xwmc3</i>       | S3    | -0.45 <sup>*</sup>   |                                                                                                            | 0.00                                 |                                       |
| <i>QPh.cgb-1B.7</i>  | <i>P3474.4-Xcwm548</i>       | <i>QPh.cgb-2D.3</i>  | <i>Xwmc144-Xgwm157</i>       | S5    | -0.78 <sup>*</sup>   |                                                                                                            | 0.83                                 |                                       |
| <i>QPh.cgb-1B.8</i>  | <i>Xcwm548-Xcwm547</i>       | <i>QPh.cgb-3B.6</i>  | <i>Xpsp3030-Xwmc366</i>      | S2    | 1.54 <sup>***</sup>  | 0.91 <sup>*</sup> ( <i>aae10</i> )                                                                         | 0.50                                 | 0.21                                  |
| <i>QPh.cgb-1B.9</i>  | <i>Xcwm547-P5140.3</i>       | <i>QPh.cgb-6B.5</i>  | <i>Xgwm132-Xwmc104</i>       | S4    | -2.79 <sup>***</sup> |                                                                                                            | 0.47                                 |                                       |
| <i>QPh.cgb-1B.10</i> | <i>EST122-P6934.3</i>        | <i>QPh.cgb-2D.5</i>  | <i>Xgwm539-P4233.2</i>       | S5    | -2.98 <sup>***</sup> |                                                                                                            | 1.41                                 |                                       |
| <i>QPh.cgb-1B.11</i> | <i>P6934.3-P3446.6</i>       | <i>QPh.cgb-1B.16</i> | <i>Xwmc269.2-Xcwm90</i>      | S1    | 0.88 <sup>***</sup>  | 0.45 <sup>*</sup> ( <i>aae10</i> )                                                                         | 0.53                                 | 0.17                                  |
| <i>QPh.cgb-1B.12</i> | <i>P2043.3-P3622.3</i>       | <i>QPh.cgb-3B.10</i> | <i>Xgwm108-Xwmc291</i>       | S4    | 1.50 <sup>***</sup>  |                                                                                                            | 1.49                                 |                                       |
| <i>QPh.cgb-1B.12</i> | <i>P2043.3-P3622.3</i>       | <i>QPh.cgb-6B.5</i>  | <i>Xgwm132-Xwmc104</i>       | S4    | 0.51 <sup>*</sup>    |                                                                                                            | 0.07                                 |                                       |
| <i>QPh.cgb-1B.12</i> | <i>P2043.3-P3622.3</i>       | <i>QPh.cgb-2D.4</i>  | <i>Xgwm157-Xgwm539</i>       | S5    | -2.79 <sup>***</sup> |                                                                                                            | 0.21                                 |                                       |
| <i>QPh.cgb-1B.12</i> | <i>P2043.3-P3622.3</i>       | <i>QPh.cgb-2D.3</i>  | <i>Xwmc144-Xgwm157</i>       | S5    | 0.71 <sup>*</sup>    |                                                                                                            | 0.03                                 |                                       |
| <i>QPh.cgb-1B.14</i> | <i>P1142.2-P3470.1</i>       | <i>QPh.cgb-2D.6</i>  | <i>P4233.2-P6411.4</i>       | S5    | 1.67 <sup>***</sup>  |                                                                                                            | 0.01                                 |                                       |
| <i>QPh.cgb-1B.15</i> | <i>P3470.1-P3622.2</i>       | <i>QPh.cgb-3B.10</i> | <i>Xgwm108-Xwmc291</i>       | S4    | 2.58 <sup>***</sup>  |                                                                                                            | 0.34                                 |                                       |
| <i>QPh.cgb-1B.17</i> | <i>P8143.2-P3713</i>         | <i>QPh.cgb-5A.7</i>  | <i>Xgwm291-Xgwm410</i>       | S3    | -3.39 <sup>***</sup> |                                                                                                            | 0.59                                 |                                       |
| <i>QPh.cgb-1B.18</i> | <i>Xwmc44-Xgwm259</i>        | <i>QPh.cgb-5B.5</i>  | <i>P3516.1-P5140.2</i>       | S2    | 1.39 <sup>***</sup>  |                                                                                                            | 0.25                                 |                                       |
| <i>QPh.cgb-1B.18</i> | <i>Xwmc44-Xgwm259</i>        | <i>QPh.cgb-5B.7</i>  | <i>P4138-P5166.3</i>         | S2    | -1.48 <sup>***</sup> |                                                                                                            | 0.33                                 |                                       |
| <i>QPh.cgb-1B.18</i> | <i>Xwmc44-Xgwm259</i>        | <i>QPh.cgb-5B.4</i>  | <i>Xgwm371-Xgwm335</i>       | S2    | -0.52 <sup>***</sup> |                                                                                                            | 0.00                                 |                                       |
| <i>QPh.cgb-1B.19</i> | <i>Xgwm259-Xwmc367</i>       | <i>QPh.cgb-7B.4</i>  | <i>Xpsp3033-Xgwm297</i>      | S3    | 2.79 <sup>***</sup>  | -2.14 <sup>**</sup> ( <i>aae1</i> ), 1.58 <sup>*</sup> ( <i>aae8</i> ), 1.82 <sup>*</sup> ( <i>aae10</i> ) | 0.85                                 | 0.31                                  |
| <i>QPh.cgb-1B.19</i> | <i>Xgwm259-Xwmc367</i>       | <i>QPh.cgb-4B.1</i>  | <i>Xgwm368-Xgwm107</i>       | S4    | -1.39 <sup>***</sup> |                                                                                                            | 0.37                                 |                                       |
| <i>QPh.cgb-1B.20</i> | <i>Xwmc367-P8444.5</i>       | <i>QPh.cgb-5B.5</i>  | <i>P3516.1-P5140.2</i>       | S2    | -1.37 <sup>***</sup> |                                                                                                            | 0.21                                 |                                       |
| <i>QPh.cgb-1D.1</i>  | <i>P3470.7-Xcwm170</i>       | <i>QPh.cgb-4A.1</i>  | <i>Xwmc420-Xgwm601</i>       | S2    | 0.82 <sup>***</sup>  |                                                                                                            | 0.31                                 |                                       |
| <i>QPh.cgb-1D.2</i>  | <i>Xcwm1-Xwmc432</i>         | <i>QPh.cgb-5B.3</i>  | <i>Xgwm499-Xgwm371</i>       | S3    | -2.09 <sup>***</sup> |                                                                                                            | 0.24                                 |                                       |
| <i>QPh.cgb-1D.2</i>  | <i>Xcwm1-Xwmc432</i>         | <i>QPh.cgb-5D</i>    | <i>Xgdm68-Xgdm3</i>          | S4    | -1.26 <sup>***</sup> |                                                                                                            | 0.38                                 |                                       |
| <i>QPh.cgb-2A.2</i>  | <i>Xwmc264.2-P8966.2</i>     | <i>QPh.cgb-7D.3</i>  | <i>Xwmc463-Xgwm295</i>       | S1    | 0.84 <sup>***</sup>  |                                                                                                            | 0.34                                 |                                       |
| <i>QPh.cgb-2A.3</i>  | <i>Xgwm328-Xwmc179.4</i>     | <i>QPh.cgb-3A.3</i>  | <i>Xgwm391-P8422</i>         | S2    | 0.55 <sup>***</sup>  |                                                                                                            | 0.09                                 |                                       |

|                      |                          |                      |                          |    |                      |                                                                                                                                                   |      |      |
|----------------------|--------------------------|----------------------|--------------------------|----|----------------------|---------------------------------------------------------------------------------------------------------------------------------------------------|------|------|
| <i>QPh.cgb-2A.5</i>  | <i>Xgwm448-Xgwm558</i>   | <i>QPh.cgb-3A.3</i>  | <i>Xgwm391-P8422</i>     | S2 | -1.43 <sup>***</sup> |                                                                                                                                                   | 0.07 |      |
| <i>QPh.cgb-2A.7</i>  | <i>P5644.1-Xgwm122</i>   | <i>QPh.cgb-6A.7</i>  | <i>Xcwm487-P3465.4</i>   | S2 | 0.91 <sup>***</sup>  |                                                                                                                                                   | 0.45 |      |
| <i>QPh.cgb-2A.8</i>  | <i>Xcwm138.2-P2478.2</i> | <i>QPh.cgb-2D.7</i>  | <i>Xwmc170-Xcwm96.2</i>  | S2 | 0.32 <sup>*</sup>    |                                                                                                                                                   | 0.00 |      |
| <i>QPh.cgb-2A.9</i>  | <i>P2478.2-Xwmc27.2</i>  | <i>QPh.cgb-6A.7</i>  | <i>Xcwm487-P3465.4</i>   | S2 | 1.85 <sup>***</sup>  | 1.08 <sup>*</sup> ( <i>aae10</i> )                                                                                                                | 0.56 | 0.14 |
| <i>QPh.cgb-2A.10</i> | <i>Xwmc27.2-P5166.2</i>  | <i>QPh.cgb-7D.4</i>  | <i>Xwmc436-Xgwm44</i>    | S3 | 2.83 <sup>***</sup>  | -1.86 <sup>***</sup> ( <i>aae1</i> ), 1.65 <sup>**</sup> ( <i>aae8</i> ), 1.33 <sup>*</sup> ( <i>aae10</i> )                                      | 0.33 | 0.13 |
| <i>QPh.cgb-2B.1</i>  | <i>Xcwm529-Xwmc317</i>   | <i>QPh.cgb-7A.5</i>  | <i>Xgwm635.1-P2454.4</i> | S1 | 0.83 <sup>***</sup>  |                                                                                                                                                   | 0.79 |      |
| <i>QPh.cgb-2B.2</i>  | <i>Xwmc317-P6411.2</i>   | <i>QPh.cgb-3D.3</i>  | <i>Xgwm341-Xgwm456</i>   | S5 | -1.00 <sup>***</sup> |                                                                                                                                                   | 0.15 |      |
| <i>QPh.cgb-2B.3</i>  | <i>P3454.4-Xgwm501</i>   | <i>QPh.cgb-3B.13</i> | <i>Xgwm181-Xgwm340</i>   | S2 | -1.12 <sup>***</sup> |                                                                                                                                                   | 0.85 |      |
| <i>QPh.cgb-2B.3</i>  | <i>P3454.4-Xgwm501</i>   | <i>QPh.cgb-3B.14</i> | <i>Xgwm247-P2449.4</i>   | S2 | -0.49 <sup>*</sup>   |                                                                                                                                                   | 0.00 |      |
| <i>QPh.cgb-2B.4</i>  | <i>P6901.1-Xwmc27.1</i>  | <i>QPh.cgb-7D.1</i>  | <i>Xgdm86-Xgdm88</i>     | S3 | -1.61 <sup>***</sup> |                                                                                                                                                   | 0.83 |      |
| <i>QPh.cgb-2B.4</i>  | <i>P6901.1-Xwmc27.1</i>  | <i>QPh.cgb-7D.2</i>  | <i>Xgdm88-Xwmc463</i>    | S4 | 1.32 <sup>***</sup>  |                                                                                                                                                   | 0.06 |      |
| <i>QPh.cgb-2D.1</i>  | <i>Xwmc453.1-Xwmc18</i>  | <i>QPh.cgb-4A.5</i>  | <i>P6431.1-Xgwm160</i>   | S1 | -0.75 <sup>***</sup> |                                                                                                                                                   | 0.72 |      |
|                      |                          |                      |                          | S2 | -1.61 <sup>***</sup> |                                                                                                                                                   | 1.18 |      |
|                      |                          |                      |                          | S3 | -1.73 <sup>***</sup> |                                                                                                                                                   | 1.00 |      |
|                      |                          |                      |                          | S5 | -0.76 <sup>*</sup>   |                                                                                                                                                   | 1.28 |      |
| <i>QPh.cgb-2D.1</i>  | <i>Xwmc453.1-Xwmc18</i>  | <i>QPh.cgb-4D.1</i>  | <i>Xgwm165.2-Xgwm192</i> | S3 | -1.24 <sup>***</sup> |                                                                                                                                                   | 0.34 |      |
| <i>QPh.cgb-2D.1</i>  | <i>Xwmc453.1-Xwmc18</i>  | <i>QPh.cgb-6B.7</i>  | <i>Xwmc269.3-P4232.1</i> | S4 | -0.90 <sup>***</sup> |                                                                                                                                                   | 0.09 |      |
| <i>QPh.cgb-2D.2</i>  | <i>Xwmc18-Xgwm30</i>     | <i>QPh.cgb-2D.4</i>  | <i>Xgwm157-Xgwm539</i>   | S5 | 3.82 <sup>***</sup>  |                                                                                                                                                   | 0.58 |      |
| <i>QPh.cgb-2D.4</i>  | <i>Xgwm157-Xgwm539</i>   | <i>QPh.cgb-3B.12</i> | <i>Xgwm547-Xgwm181</i>   | S4 | 2.02 <sup>***</sup>  |                                                                                                                                                   | 0.65 |      |
| <i>QPh.cgb-2D.5</i>  | <i>Xgwm539-P4233.2</i>   | <i>QPh.cgb-3B.14</i> | <i>Xgwm247-P2449.4</i>   | S5 | -2.51 <sup>***</sup> |                                                                                                                                                   | 0.73 |      |
| <i>QPh.cgb-2D.6</i>  | <i>P4233.2-P6411.4</i>   | <i>QPh.cgb-4B.1</i>  | <i>Xgwm368-Xgwm107</i>   | S4 | 1.80 <sup>***</sup>  |                                                                                                                                                   | 0.76 |      |
| <i>QPh.cgb-2D.6</i>  | <i>P4233.2-P6411.4</i>   | <i>QPh.cgb-4D.1</i>  | <i>Xgwm165.2-Xgwm192</i> | S4 | 2.31 <sup>***</sup>  |                                                                                                                                                   | 1.58 |      |
| <i>QPh.cgb-2D.7</i>  | <i>Xwmc170-Xcwm96.2</i>  | <i>QPh.cgb-5A.3</i>  | <i>P2470-Xgwm154</i>     | S1 | 0.72 <sup>***</sup>  |                                                                                                                                                   | 0.30 |      |
| <i>QPh.cgb-2D.7</i>  | <i>Xwmc170-Xcwm96.2</i>  | <i>QPh.cgb-7B.3</i>  | <i>Xcwm96.1-Xwmc311</i>  | S3 | 3.93 <sup>***</sup>  | -1.62 <sup>***</sup> ( <i>aae1</i> ), -1.19 <sup>*</sup> ( <i>aae2</i> ), -1.07 <sup>*</sup> ( <i>aae6</i> ), 1.67 <sup>***</sup> ( <i>aae8</i> ) | 1.21 | 0.25 |
| <i>QPh.cgb-2D.8</i>  | <i>Xcwm96.2-Xwmc181</i>  | <i>QPh.cgb-3B.4</i>  | <i>Xwmc231-Xgwm284</i>   | S5 | 1.53 <sup>***</sup>  |                                                                                                                                                   | 0.46 |      |
| <i>QPh.cgb-2D.8</i>  | <i>Xcwm96.2-Xwmc181</i>  | <i>QPh.cgb-3B.6</i>  | <i>Xpsp3030-Xwmc366</i>  | S5 | 1.65 <sup>***</sup>  |                                                                                                                                                   | 0.11 |      |
| <i>QPh.cgb-2D.10</i> | <i>P3470.3-P3176.1</i>   | <i>QPh.cgb-3A.3</i>  | <i>Xgwm391-P8422</i>     | S2 | 0.93 <sup>***</sup>  |                                                                                                                                                   | 0.03 |      |
| <i>QPh.cgb-2D.11</i> | <i>P3176.1-P1123.1</i>   | <i>QPh.cgb-7B.2</i>  | <i>Xwmc526-Xwmc273</i>   | S3 | 1.46 <sup>***</sup>  |                                                                                                                                                   | 0.13 |      |
| <i>QPh.cgb-2D.11</i> | <i>P3176.1-P1123.1</i>   | <i>QPh.cgb-7B.3</i>  | <i>Xcwm96.1-Xwmc311</i>  | S3 | -0.60 <sup>***</sup> |                                                                                                                                                   | 0.01 |      |
| <i>QPh.cgb-3A.1</i>  | <i>Xcwm48.1-Xwmc532</i>  | <i>QPh.cgb-6A.6</i>  | <i>Xgwm617-Xcwm487</i>   | S5 | -2.15 <sup>***</sup> | 1.57 <sup>*</sup> ( <i>aae1</i> )                                                                                                                 | 0.66 | 0.21 |
| <i>QPh.cgb-3A.2</i>  | <i>Xwmc21-Xwmc505.2</i>  | <i>QPh.cgb-3B.5</i>  | <i>Xgwm72-Xgwm274</i>    | S5 | 3.08 <sup>***</sup>  |                                                                                                                                                   | 1.87 |      |
| <i>QPh.cgb-3B.1</i>  | <i>P2478.1-Xwmc505.1</i> | <i>QPh.cgb-6A.6</i>  | <i>Xgwm617-Xcwm487</i>   | S1 | -0.82 <sup>***</sup> |                                                                                                                                                   | 0.24 |      |
| <i>QPh.cgb-3B.3</i>  | <i>P2449.2-Xwmc231</i>   | <i>QPh.cgb-6B.1</i>  | <i>P3516.2-P8966.1</i>   | S4 | -1.48 <sup>***</sup> |                                                                                                                                                   | 0.47 |      |
| <i>QPh.cgb-3B.5</i>  | <i>Xgwm72-Xgwm274</i>    | <i>QPh.cgb-7B.4</i>  | <i>Xpsp3033-Xgwm297</i>  | S3 | -1.16 <sup>***</sup> |                                                                                                                                                   | 0.83 |      |
| <i>QPh.cgb-3B.5</i>  | <i>Xgwm72-Xgwm274</i>    | <i>QPh.cgb-6B.1</i>  | <i>P3516.2-P8966.1</i>   | S4 | -0.76 <sup>***</sup> |                                                                                                                                                   | 0.05 |      |
| <i>QPh.cgb-3B.5</i>  | <i>Xgwm72-Xgwm274</i>    | <i>QPh.cgb-6A.5</i>  | <i>Xwmc417.1-P1832</i>   | S4 | -2.02 <sup>***</sup> |                                                                                                                                                   | 1.31 |      |
| <i>QPh.cgb-3B.8</i>  | <i>Xwmc3-P6934.7</i>     | <i>QPh.cgb-7B.4</i>  | <i>Xpsp3033-Xgwm297</i>  | S3 | -2.41 <sup>***</sup> |                                                                                                                                                   | 0.26 |      |

|                      |                         |                     |                          |    |                      |                                                                                                                                                |      |      |
|----------------------|-------------------------|---------------------|--------------------------|----|----------------------|------------------------------------------------------------------------------------------------------------------------------------------------|------|------|
| <i>QPh.cgb-3B.14</i> | <i>Xgwm247-P2449.4</i>  | <i>QPh.cgb-3D.1</i> | <i>Xwmc437-Xwmc529.1</i> | S4 | -4.07 <sup>***</sup> | 2.18 <sup>*</sup> ( <i>aae1</i> )                                                                                                              | 1.97 | 0.33 |
| <i>QPh.cgb-3D.2</i>  | <i>Xgdm72-Xgwm341</i>   | <i>QPh.cgb-6A.2</i> | <i>Xgdm36-P3474.2</i>    | S4 | -1.46 <sup>***</sup> |                                                                                                                                                | 0.27 |      |
| <i>QPh.cgb-4A.2</i>  | <i>Xgwm601-Xgwm610</i>  | <i>QPh.cgb-6A.2</i> | <i>Xgdm36-P3474.2</i>    | S3 | -0.83 <sup>***</sup> |                                                                                                                                                | 0.21 |      |
| <i>QPh.cgb-4A.3</i>  | <i>P8222.2-P5611.1</i>  | <i>QPh.cgb-6B.6</i> | <i>Xcwm29-P3476.2</i>    | S5 | 1.04 <sup>***</sup>  |                                                                                                                                                | 0.71 |      |
| <i>QPh.cgb-4A.4</i>  | <i>P2454.3-P3465.1</i>  | <i>QPh.cgb-6B.6</i> | <i>Xcwm29-P3476.2</i>    | S5 | 1.49 <sup>***</sup>  |                                                                                                                                                | 0.07 |      |
| <i>QPh.cgb-4A.5</i>  | <i>P6431.1-Xgwm160</i>  | <i>QPh.cgb-7B.4</i> | <i>Xpsp3033-Xgwm297</i>  | S3 | 1.49 <sup>***</sup>  |                                                                                                                                                | 1.11 |      |
| <i>QPh.cgb-4B.1</i>  | <i>Xgwm368-Xgwm107</i>  | <i>QPh.cgb-5A.7</i> | <i>Xgwm291-Xgwm410</i>   | S3 | 1.93 <sup>***</sup>  |                                                                                                                                                | 0.76 |      |
| <i>QPh.cgb-4B.3</i>  | <i>Xgwm149-Xwmc349</i>  | <i>QPh.cgb-5B.4</i> | <i>Xgwm371-Xgwm335</i>   | S2 | -1.95 <sup>***</sup> | 1.05 <sup>*</sup> ( <i>aae1</i> ), -1.14 <sup>*</sup> ( <i>aae10</i> )                                                                         | 0.91 | 0.32 |
| <i>QPh.cgb-5A.1</i>  | <i>Xgwm415-Xgwm304</i>  | <i>QPh.cgb-7A.8</i> | <i>P1111-P3622.1</i>     | S2 | -2.29 <sup>***</sup> | -1.47 <sup>***</sup> ( <i>aae10</i> )                                                                                                          | 1.14 | 0.36 |
| <i>QPh.cgb-5A.2</i>  | <i>Xgwm304-P2470</i>    | <i>QPh.cgb-5A.4</i> | <i>Xgwm205.1-Xgwm443</i> | S5 | -4.69 <sup>***</sup> | 2.54 <sup>***</sup> ( <i>aae1</i> ), -1.62 <sup>*</sup> ( <i>aae4</i> ), 1.50 <sup>*</sup> ( <i>aae6</i> ), -1.51 <sup>*</sup> ( <i>aae9</i> ) | 2.49 | 0.39 |
| <i>QPh.cgb-5A.2</i>  | <i>Xgwm304-P2470</i>    | <i>QPh.cgb-5A.5</i> | <i>Xgwm443-P3616.5</i>   | S5 | -1.00 <sup>***</sup> |                                                                                                                                                | 0.09 |      |
| <i>QPh.cgb-5B.8</i>  | <i>P2454.2-Xgwm408</i>  | <i>QPh.cgb-6A.2</i> | <i>Xgdm36-P3474.2</i>    | S4 | -1.98 <sup>***</sup> |                                                                                                                                                | 0.37 |      |
| <i>QPh.cgb-6A.4</i>  | <i>Xpsp3071-Xgwm570</i> | <i>QPh.cgb-7B.4</i> | <i>Xpsp3033-Xgwm297</i>  | S1 | -0.76 <sup>***</sup> | -0.69 <sup>*</sup> ( <i>aae10</i> )                                                                                                            | 0.27 | 0.21 |
| <i>QPh.cgb-6B.5</i>  | <i>Xgwm132-Xwmc104</i>  | <i>QPh.cgb-6B.7</i> | <i>Xwmc269.3-P4232.1</i> | S5 | -2.37 <sup>***</sup> |                                                                                                                                                | 0.79 |      |
| <i>QPh.cgb-7A.6</i>  | <i>P6934.2-P3446.5</i>  | <i>QPh.cgb-7B.1</i> | <i>Xwmc269.4-P3446.7</i> | S4 | -1.01 <sup>***</sup> |                                                                                                                                                | 0.00 |      |
| <i>QPh.cgb-7A.7</i>  | <i>P8443.2-Xgwm282</i>  | <i>QPh.cgb-7B.1</i> | <i>Xwmc269.4-P3446.7</i> | S4 | 1.24 <sup>***</sup>  |                                                                                                                                                | 0.04 |      |

QTL<sub>i</sub> and QTL<sub>j</sub> are a pair of QTL involved in epistasis; *aa*, the epistatic main effect; *aae1*, the epistasis × environment interaction effects in E1, *aae2*, the epistasis × environment interaction effects in E2, and so on; A positive value means that the parent-type effect is greater than the recombinant-type effect, and the negative value means that the parent-type effect is less than the recombinant-type effect;  $h^2(aa)\%$ , Phenotypic variation explained (PVE) by *aa* effects;  $h^2(aae)\%$ , PVE by *aae* effects; S1, S2, S3, S4, S5 are as shown in Table S1.

<sup>\*</sup>, <sup>\*\*</sup>, <sup>\*\*\*</sup>, significant at P= 0.05, 0.01 and 0.005, respectively.

Table S6. Conditional epistatic QTLs affecting plant height of wheat in five periods in ten environments

| QTL <sub>i</sub>     | Flanking marker <sub>i</sub> | QTL <sub>j</sub>     | Flanking markers <sub>j</sub> | Period | aa                                                                                                                                                                                                                       | aae                                                                                                                                                                                                                       | h <sup>2</sup> (aa)% | h <sup>2</sup> (aae)% |
|----------------------|------------------------------|----------------------|-------------------------------|--------|--------------------------------------------------------------------------------------------------------------------------------------------------------------------------------------------------------------------------|---------------------------------------------------------------------------------------------------------------------------------------------------------------------------------------------------------------------------|----------------------|-----------------------|
| <i>QPh.cgb-1A.2</i>  | <i>P3156.2-Xwmc59</i>        | <i>QPh.cgb-5B.2</i>  | <i>Xwmc363-Xwmc376</i>        | S4 S3  | -0.93 <sup>***</sup> ( <i>aae2</i> ), 0.70 <sup>*</sup> ( <i>aae4</i> ), -0.62 <sup>*</sup> ( <i>aae6</i> ), 0.61 <sup>*</sup> ( <i>aae7</i> ), -0.82 <sup>**</sup> ( <i>aae8</i> ), 1.25 <sup>***</sup> ( <i>aae9</i> ) |                                                                                                                                                                                                                           |                      | 0.49                  |
| <i>QPh.cgb-1B.1</i>  | <i>Xgwm582-Xgwm273</i>       | <i>QPh.cgb-3B.11</i> | <i>Xwmc291-P3156.1</i>        | S2 S1  | 0.38 <sup>***</sup>                                                                                                                                                                                                      |                                                                                                                                                                                                                           | 0.28                 |                       |
| <i>QPh.cgb-1B.1</i>  | <i>Xgwm582-Xgwm273</i>       | <i>QPh.cgb-3B.2</i>  | <i>Xwmc505.1-Xwmc529.2</i>    | S2 S1  | -0.50 <sup>***</sup>                                                                                                                                                                                                     | 0.73 <sup>*</sup> ( <i>aae2</i> ), -0.85 <sup>***</sup> ( <i>aae10</i> )                                                                                                                                                  | 0.25                 | 0.48                  |
| <i>QPh.cgb-1B.4</i>  | <i>Xwmc156-P3446.1</i>       | <i>QPh.cgb-3B.11</i> | <i>Xwmc291-P3156.1</i>        | S2 S1  | 0.30 <sup>***</sup>                                                                                                                                                                                                      | -0.48 <sup>*</sup> ( <i>aae1</i> ), -0.48 <sup>*</sup> ( <i>aae6</i> )                                                                                                                                                    | 0.03                 | 0.12                  |
| <i>QPh.cgb-1B.9</i>  | <i>Xcwm547-P5140.3</i>       | <i>QPh.cgb-2D.6</i>  | <i>P4233.2-P6411.4</i>        | S5 S4  |                                                                                                                                                                                                                          | -1.34 <sup>***</sup> ( <i>aae4</i> ), 0.83 <sup>*</sup> ( <i>aae8</i> )                                                                                                                                                   |                      | 0.37                  |
| <i>QPh.cgb-1B.11</i> | <i>P6934.3-P3446.6</i>       | <i>QPh.cgb-1B.16</i> | <i>Xwmc269.2-Xcwm90</i>       | S1 S0  | 0.88 <sup>***</sup>                                                                                                                                                                                                      | 0.45 <sup>*</sup> ( <i>aae10</i> )                                                                                                                                                                                        | 0.53                 | 0.17                  |
| <i>QPh.cgb-1B.13</i> | <i>P3622.3-P1133</i>         | <i>QPh.cgb-2D.6</i>  | <i>P4233.2-P6411.4</i>        | S5 S4  | -0.50 <sup>***</sup>                                                                                                                                                                                                     |                                                                                                                                                                                                                           | 0.05                 |                       |
| <i>QPh.cgb-2A.2</i>  | <i>Xwmc264.2-P8966.2</i>     | <i>QPh.cgb-7D.3</i>  | <i>Xwmc463-Xgwm295</i>        | S1 S0  | 0.84 <sup>***</sup>                                                                                                                                                                                                      |                                                                                                                                                                                                                           | 0.34                 |                       |
| <i>QPh.cgb-2A.4</i>  | <i>Xwmc51-Xgwm68.2</i>       | <i>QPh.cgb-2D.9</i>  | <i>Xwmc181-P3470.3</i>        | S3 S2  | 0.26 <sup>**</sup>                                                                                                                                                                                                       |                                                                                                                                                                                                                           | 0.04                 |                       |
| <i>QPh.cgb-2A.6</i>  | <i>Xgwm275-Xgwm339</i>       | <i>QPh.cgb-2D.10</i> | <i>P3470.3-P3176.1</i>        | S3 S2  |                                                                                                                                                                                                                          | -0.90 <sup>***</sup> ( <i>aae2</i> ), 0.59 <sup>*</sup> ( <i>aae8</i> )                                                                                                                                                   |                      | 0.18                  |
| <i>QPh.cgb-2B.1</i>  | <i>Xcwm529-Xwmc317</i>       | <i>QPh.cgb-7A.5</i>  | <i>Xgwm635.1-P2454.4</i>      | S1 S0  | 0.83 <sup>***</sup>                                                                                                                                                                                                      |                                                                                                                                                                                                                           | 0.79                 |                       |
| <i>QPh.cgb-2D.1</i>  | <i>Xwmc453.1-Xwmc18</i>      | <i>QPh.cgb-4A.5</i>  | <i>P6431.1-Xgwm160</i>        | S1 S0  | -0.75 <sup>***</sup>                                                                                                                                                                                                     |                                                                                                                                                                                                                           | 0.72                 |                       |
| <i>QPh.cgb-2D.1</i>  | <i>Xwmc453.1-Xwmc18</i>      | <i>QPh.cgb-7A.9</i>  | <i>P3461.2-P6411.1</i>        | S2 S1  | -0.63 <sup>***</sup>                                                                                                                                                                                                     | 0.55 <sup>*</sup> ( <i>aae4</i> )                                                                                                                                                                                         | 0.31                 | 0.22                  |
| <i>QPh.cgb-2D.7</i>  | <i>Xwmc170-Xcwm96.2</i>      | <i>QPh.cgb-5A.3</i>  | <i>P2470-Xgwm154</i>          | S1 S0  | 0.72 <sup>***</sup>                                                                                                                                                                                                      |                                                                                                                                                                                                                           | 0.30                 |                       |
| <i>QPh.cgb-3B.1</i>  | <i>P2478.1-Xwmc505.1</i>     | <i>QPh.cgb-6A.6</i>  | <i>Xgwm617-Xcwm487</i>        | S1 S0  | -0.82 <sup>***</sup>                                                                                                                                                                                                     |                                                                                                                                                                                                                           | 0.24                 |                       |
| <i>QPh.cgb-3B.11</i> | <i>Xwmc291-P3156.1</i>       | <i>QPh.cgb-6B.8</i>  | <i>Xgwm644.1-Xwmc417.2</i>    | S5 S4  |                                                                                                                                                                                                                          | -1.38 <sup>***</sup> ( <i>aae7</i> )                                                                                                                                                                                      |                      | 0.46                  |
| <i>QPh.cgb-4B.1</i>  | <i>Xgwm368-Xgwm107</i>       | <i>QPh.cgb-7D.4</i>  | <i>Xwmc436-Xgwm44</i>         | S4 S3  |                                                                                                                                                                                                                          | 0.62 <sup>*</sup> ( <i>aae4</i> ), -1.06 <sup>***</sup> ( <i>aae6</i> ), -0.67 <sup>*</sup> ( <i>aae8</i> )                                                                                                               |                      | 0.42                  |
| <i>QPh.cgb-4B.2</i>  | <i>Xgwm107-Xgwm513</i>       | <i>QPh.cgb-7D.4</i>  | <i>Xwmc436-Xgwm44</i>         | S4 S3  | -0.24 <sup>*</sup>                                                                                                                                                                                                       |                                                                                                                                                                                                                           | 0.02                 |                       |
| <i>QPh.cgb-4B.2</i>  | <i>Xgwm107-Xgwm513</i>       | <i>QPh.cgb-7A.4</i>  | <i>Xcwm462.2-Xgwm635.2</i>    | S5 S4  | -0.50 <sup>***</sup>                                                                                                                                                                                                     | -0.87 <sup>*</sup> ( <i>aae2</i> ), -0.90 <sup>*</sup> ( <i>aae4</i> ), 0.71 <sup>*</sup> ( <i>aae5</i> ), -1.55 <sup>***</sup> ( <i>aae7</i> ), 1.43 <sup>***</sup> ( <i>aae8</i> ), 0.97 <sup>**</sup> ( <i>aae10</i> ) | 0.16                 | 0.79                  |
| <i>QPh.cgb-5A.6</i>  | <i>Xgwm595-Xwmc410</i>       | <i>QPh.cgb-5B.6</i>  | <i>P5140.2-P4138</i>          | S3 S2  | -0.43 <sup>***</sup>                                                                                                                                                                                                     | 0.80 <sup>*</sup> ( <i>aae1</i> ), 0.88 <sup>***</sup> ( <i>aae2</i> ), -0.86 <sup>**</sup> ( <i>aae5</i> ), 1.22 <sup>***</sup> ( <i>aae6</i> ), -0.94 <sup>***</sup> ( <i>aae8</i> )                                    | 0.12                 | 0.47                  |
| <i>QPh.cgb-5B.1</i>  | <i>Xgwm234-Xwmc363</i>       | <i>QPh.cgb-7A.1</i>  | <i>P3465.2-Xcwm48.2</i>       | S3 S2  |                                                                                                                                                                                                                          | 0.63 <sup>*</sup> ( <i>aae2</i> ), -0.74 <sup>*</sup> ( <i>aae4</i> ), -0.77 <sup>*</sup> ( <i>aae5</i> ), 0.88 <sup>**</sup> ( <i>aae6</i> ), -0.63 <sup>*</sup> ( <i>aae8</i> ), 0.78 <sup>*</sup> ( <i>aae10</i> )     |                      | 0.39                  |
| <i>QPh.cgb-6A.4</i>  | <i>Xpsp3071-Xgwm570</i>      | <i>QPh.cgb-7B.4</i>  | <i>Xpsp3033-Xgwm297</i>       | S1 S0  | -0.76 <sup>***</sup>                                                                                                                                                                                                     | -0.69 <sup>*</sup> ( <i>aae10</i> )                                                                                                                                                                                       | 0.27                 | 0.21                  |
| <i>QPh.cgb-6B.4</i>  | <i>P8444.2-Xgwm132</i>       | <i>QPh.cgb-7A.2</i>  | <i>Xcwm48.2-Xcwm462.1</i>     | S5 S4  | -0.64 <sup>***</sup>                                                                                                                                                                                                     |                                                                                                                                                                                                                           | 0.32                 |                       |

All the other notes are the same as shown in Table S5 except that S1|S0, S2|S1, S3|S2, S4|S3, S5|S4 are the same as in Table S2.
